# Supplementary material for: Oxygen-vacancy-mediated electron localization at the nickel sites in nickel/iron layered double hydroxide towards efficient oxygen evolution reaction
Source: Royal Society of Chemistry journal article supplement (doi:10.1039/d3ta04000c), 2023-12-21
Supplement: d3ta04000c1.pdf [file d3ta04000c1.pdf]

## Supporting Information

### Oxygen-vacancy-mediated electron localization at the nickel sites in nickel/iron layered double hydroxide towards efficient oxygen evolution reaction

Jing Zhang,<sup>a,b</sup> Meng Li,<sup>c</sup> Zhiqiang Qiao,<sup>a,b</sup> Kaixuan Huo,<sup>d</sup> Yang Yang,<sup>e</sup> Deqiang Ji,<sup>a,b</sup>  
Dandan Yuan,<sup>a,b</sup> Liyu Lin,<sup>f\*</sup> Zhida Li,<sup>a,b,e\*</sup> Hongjun Wu<sup>a,b\*</sup>

a National Key Laboratory of Continental Shale Oil, Northeast Petroleum University,  
Daqing, Heilongjiang 163318, China

b College of New Energy and Materials, Northeast Petroleum University, Daqing,  
Heilongjiang 163318, China

c College of New Energy, State Key Laboratory of Heavy Oil Processing, China  
University of Petroleum (East China), Qingdao 266580, China.

d College of Chemistry and Chemical Engineering, State Key Laboratory of Heavy Oil  
Processing, China University of Petroleum (East China), Qingdao 266580, China.

e State Key Laboratory of Urban Water Resource and Environment, School of Civil  
and Environmental Engineering, Harbin Institute of Technology, Shenzhen 518055,  
China

f College of New Materials and New Energies, Shenzhen Technology University,  
Shenzhen, 518118, China

Corresponding author: Zhida Li ([lizhida@hit.edu.cn](mailto:lizhida@hit.edu.cn)), Liyu Lin ([linliyu@sztu.edu.cn](mailto:linliyu@sztu.edu.cn)),  
Hongjun Wu ([hjwu@nepu.edu.cn](mailto:hjwu@nepu.edu.cn))

## 1 Experimental Details

### 1.1 Chemicals

All chemicals utilized in this study were procured from Aladdin and employed as received without any additional purification. The deionized water (DI H<sub>2</sub>O) employed in the experimental procedures was generated using an ultrapure purification system (Edi-S0UVF).

### 1.2 Synthetic procedures

#### *1.2.1. Cleaning of the nickel foam (NF) substrate*

The synthesis of NiFe-LDH was carried out using a conventional electrodeposition technique in a standard three-electrode setup. Prior to the electrodeposition process, a nickel foam (NF) substrate measuring 1 cm × 2 cm was meticulously cleaned using a series of sequential steps. First, it was subjected to acetone, followed by immersion in a 2 M HCl solution, and subsequently rinsed with ethanol and deionized water (DI H<sub>2</sub>O) using bath sonication for 15 minutes for each solvent. This cleaning procedure effectively eliminated the surface NiO layer. Subsequently, the cleaned NF substrate was dried in a vacuum oven at a temperature of 40 °C overnight to ensure complete removal of any residual moisture.

#### *1.2.2 NiFe-LDH synthesis process*

The synthetic procedures can be found in the main article.

#### *1.2.3. RuO<sub>2</sub> electrode preparation*

The comparison sample of RuO<sub>2</sub> was loaded onto NF via a drop-casting method. Specifically, 10 mg of commercial RuO<sub>2</sub> powder was dispersed in a solution containing 195  $\mu$ L of ethanol, 775  $\mu$ L of DI H<sub>2</sub>O, and 30  $\mu$ L of Nafion solution. The dispersion was subjected to bath sonication for 30 minutes to ensure homogeneity. Subsequently, 50  $\mu$ L of the RuO<sub>2</sub> suspension was drop-casted onto a 1 cm  $\times$  2 cm NF substrate. The RuO<sub>2</sub>/NF was then dried in a vacuum oven at 40  $^{\circ}$ C for approximately 4 hours to remove any residual solvents and ensure the stability of the RuO<sub>2</sub> coating.

### 1.3 Characterization of catalysts

Microscopic morphological features of the NiFe-LDH samples were investigated using Scanning Electron Microscopy (SEM) and Transmission Electron Microscopy (TEM) techniques. The SEM analysis was performed using a SIGM instrument from Zeiss Company, while the TEM analysis was conducted using an FEI-TALOS-F200X microscope. Energy dispersive X-ray (EDX) data were acquired using the Super-X system. Inductively coupled plasma optical emission spectrometry (ICP-OES) analysis was conducted using a Thermo Fisher iCAP 7400 spectrometer. The crystal structure and phase composition were characterized by X-ray Diffraction (XRD) using a Bruker D8 Advance instrument. To explore the electronic structure, X-ray Photoelectron Spectroscopy (XPS) measurements were carried out using a Thermofisher Escalab 250xi spectrometer. The XPS spectra obtained were analyzed using XPS peak software to determine the elemental compositions and valence states. The binding energy was calibrated using the C 1s peak at 284.6 eV. Raman spectra were acquired using the HORIBA JY LabRAM HR Evolution device with an Ar-ion laser operating at 532 nm.

Electron Paramagnetic Resonance (EPR) measurements were performed using a Bruker EMX spectrometer operating in the X-band frequency range. The X-ray absorption spectra (XAS) including X-ray absorption near-edge structure (XANES) and extended X-ray absorption fine structure (EXAFS) of the sample at Ni-edge was collected at the Beamline of TPS44A1 in National Synchrotron Radiation Research Center (NSRRC), Taiwan. 3.0 GeV a pair of channel-cut Si (111) crystals was used in the monochromator.

#### 1.4 Electrochemical measurements

Electrochemical measurements were performed using a CHI 660E electrochemistry workstation in a 1M KOH electrolyte at room temperature. A typical three-electrode configuration was employed, with a Pt foil serving as the counter electrode and a Hg/HgO electrode as the reference electrode. All potentials in this study were converted to the reversible hydrogen electrode (RHE) scale according to:  $E_{\text{RHE}} = E_{\text{apply}} + 0.0592 \cdot \text{pH} + 0.098 \text{ V}$ . The overpotential ( $\eta$ ) of the OER was calculated using the equation:  $\eta = E_{\text{RHE}} - 1.23$ .

Prior to the regular electrochemical tests, continuous cyclic voltammetry (CV) scans were performed until a stable and reproducible CV curve was obtained. Polarization curves, also known as Linear Sweep Voltammograms (LSV), were recorded at a scan rate of  $5 \text{ mV s}^{-1}$  with 90% iR compensation. Electrochemical Impedance Spectroscopy (EIS) measurements were carried out at an overpotential of 230 mV over a frequency range of  $10^5$  to 0.1 Hz. The electrochemical active surface area (ECSA) was evaluated by calculating the electrochemical double-layer capacitances ( $C_{\text{dl}}$ ) based on the CV results. CV measurements were conducted with varying scan rates of 20, 40, 60, 80,

and 100 mV s<sup>-1</sup> within the potential range of 1.024 to 1.124 V vs RHE. Stability assessment was performed through continuous CV running (2000 cycles) and chronoamperometric measurements.

### 1.5 Density of Functional Theory (DFT) Calculations

In this work, Vienna ab initio simulation package (VASP)<sup>1, 2</sup> was employed to perform DFT calculations within the generalized gradient approximation (GGA) according to the Perdew-Burke-Ernzerhof (PBE)<sup>3</sup> formulation. The projected augmented wave (PAW) potentials were chosen to describe the ionic cores. Valence electrons were taken into account by a plane wave basis set with a kinetic energy cutoff of 400 eV. The electronic energy was considered self-consistent when the energy change was smaller than 10<sup>-4</sup> eV; a geometry optimization was thought to be convergent when the energy change was smaller than 0.03 eV Å<sup>-1</sup>. The Brillouin zone was sampled with a gamma-centered grid 2× 2× 1 for all computational process. Considering the strong d-electron correlation effects for Fe and Ni, DFT + U method was used in this work with U=3.9 eV and J = 0 eV for Fe and U = 2.9 eV and J = 0 eV for Ni.<sup>4</sup>

The OER process usually summarized in four steps:

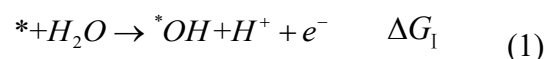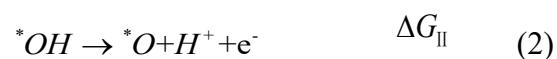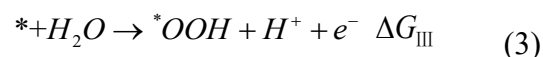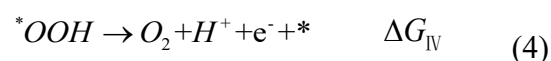

here \* denotes adsorption active site on the substrate.

$$\Delta G_I = \Delta G^*_{OH} \quad (5)$$

$$\Delta G_{II} = \Delta G^*_O - \Delta G^*_{OH} \quad (6)$$

$$\Delta G_{III} = \Delta G^*_{OOH} - \Delta G^*_O \quad (7)$$

$$\Delta G_{IV} = 4.92 - \Delta G^*_{OOH} \quad (8)$$

The overpotential ( $\eta$ ) is defined as below:

$$\eta = \max \{ \Delta G_I, \Delta G_{II}, \Delta G_{III}, \Delta G_{IV} \} - 1.23 \text{ eV} \quad (9)$$

## 2 Supplementary Figures

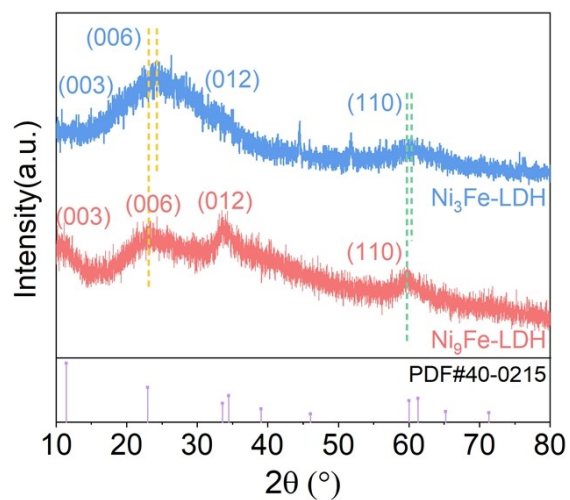

Fig. S1 XRD patterns of  $\text{Ni}_3\text{Fe-LDH}$  and  $\text{Ni}_9\text{Fe-LDH}$ .

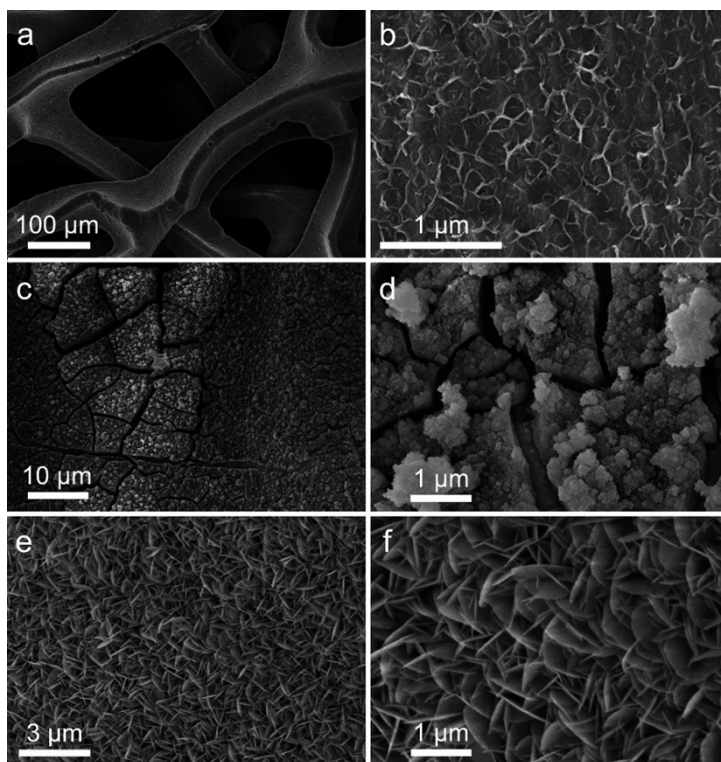

Fig. S2 SEM characterization of the Ni foam substrate,  $\text{Ni}_3\text{Fe-LDH}$ , and  $\text{Ni(OH)}_2$ . (a, b) Ni foam substrate at different magnifications, (c, d)  $\text{Ni}_3\text{Fe-LDH}$  at different magnifications, (e, f)  $\text{Ni(OH)}_2$  at different magnifications.

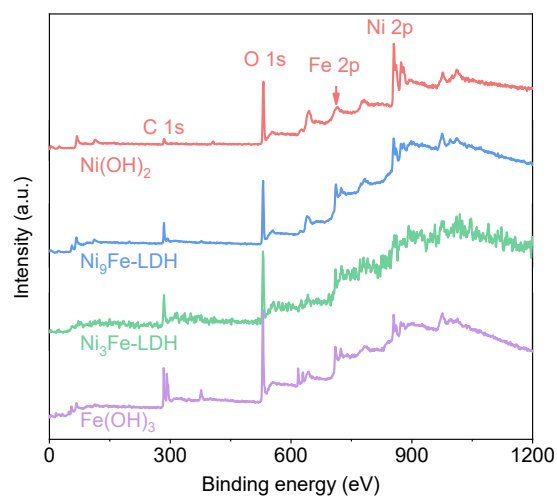

Fig. S3 XPS survey spectra of  $\text{Ni(OH)}_2$ ,  $\text{Ni}_9\text{Fe-LDH}$ ,  $\text{Ni}_3\text{Fe-LDH}$ , and  $\text{Fe(OH)}_3$ .

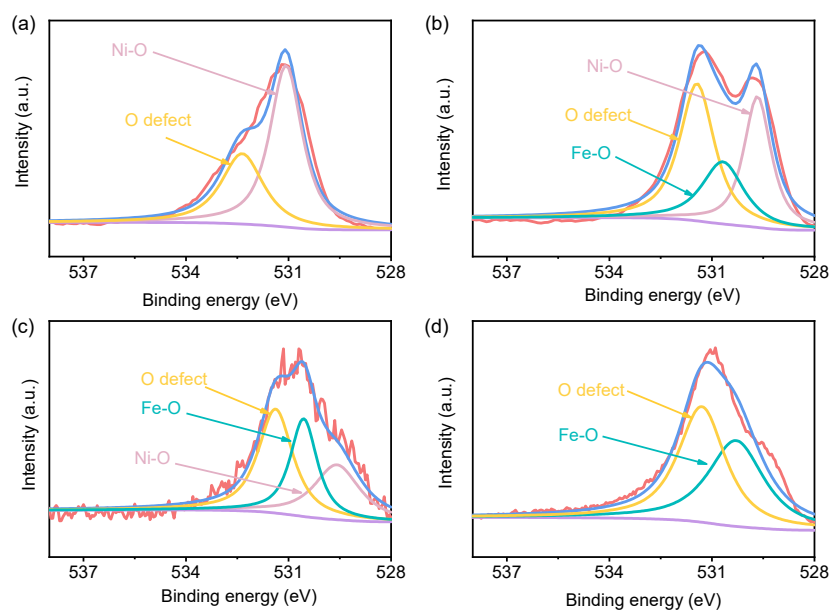

Fig. S4 High-resolution O 1s spectra of NiFe-LDH. (a)  $\text{Ni(OH)}_2$ , (b)  $\text{Ni}_9\text{Fe-LDH}$ , (c)  $\text{Ni}_3\text{Fe-LDH}$ , (d)  $\text{Fe(OH)}_3$ .

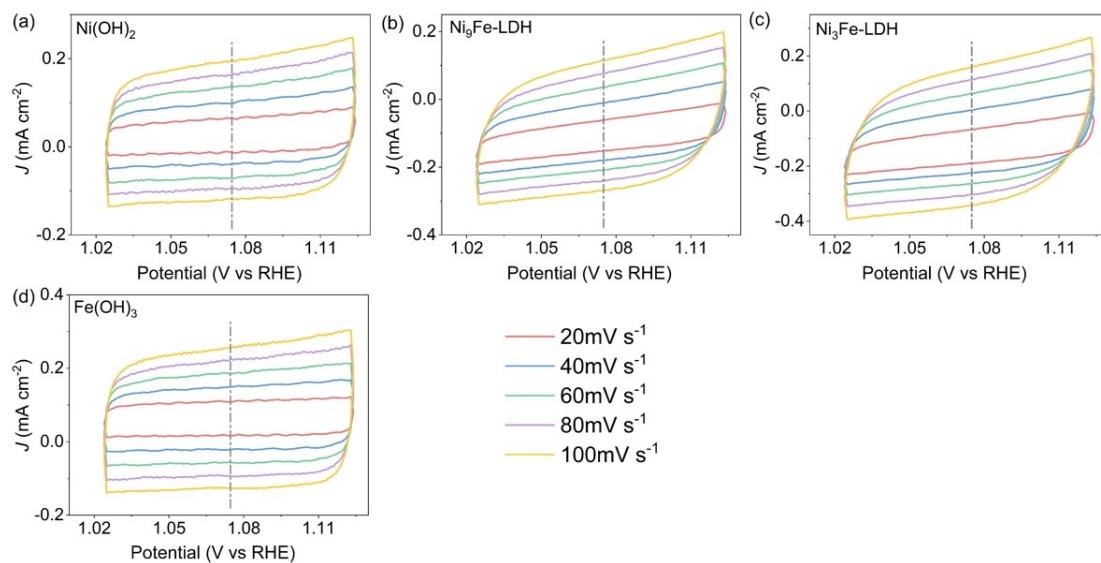

Fig. S5 CV curves of (a)  $\text{Ni}(\text{OH})_2$ , (b)  $\text{Ni}_9\text{Fe-LDH}$ , (c)  $\text{Ni}_3\text{Fe-LDH}$ , and (d)  $\text{Fe}(\text{OH})_3$ .

The CV measurements were performed with various scan rates of 20, 40, 60, 80, and 100  $\text{mV s}^{-1}$ .

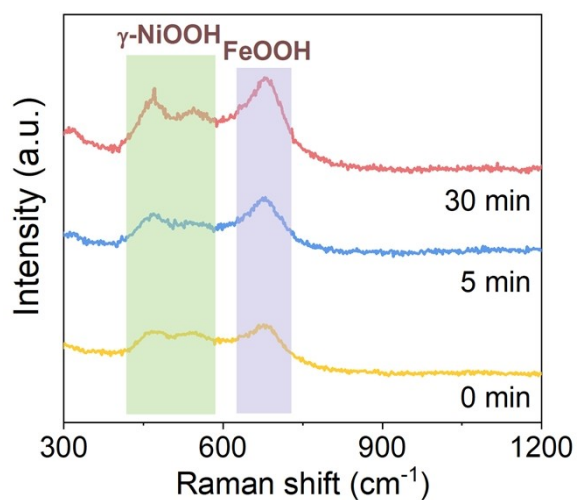

Fig. S6 Time-course Raman spectra of  $\text{Ni}_3\text{Fe-LDH}$  subsequent to different electrolysis durations at  $10 \text{ mA cm}^{-2}$ .

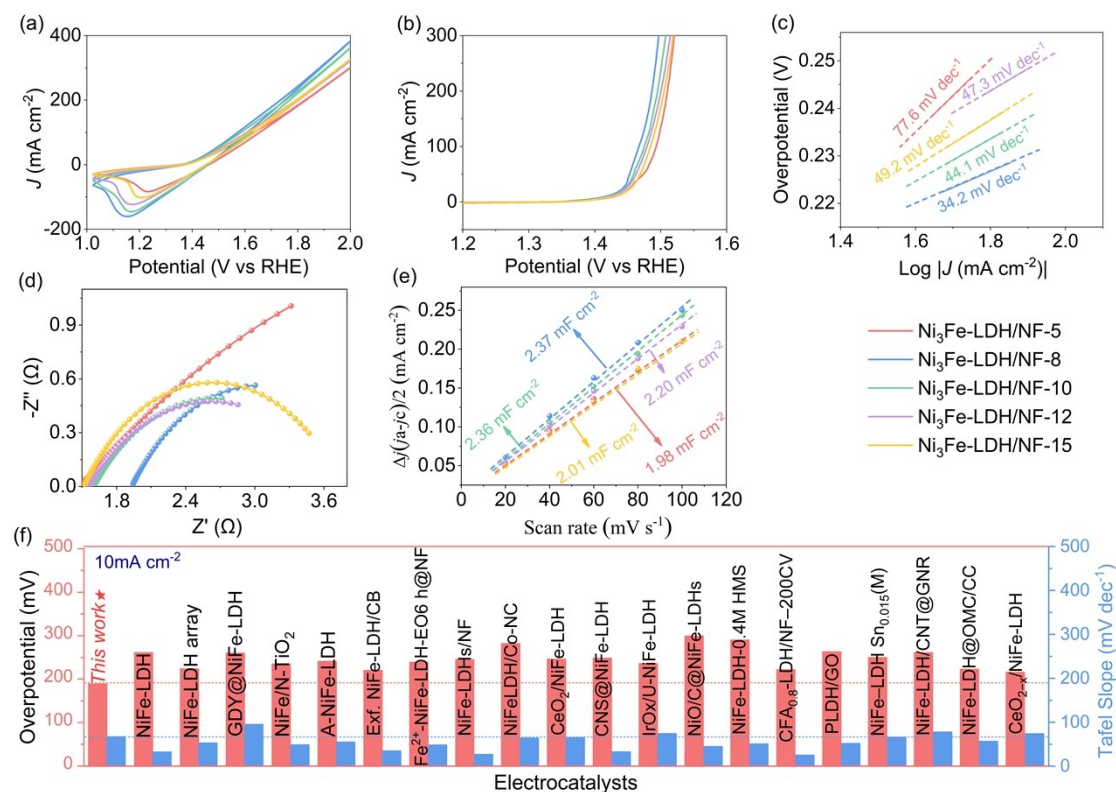

Fig. S7 Catalytic activity evaluation of  $\text{Ni}_3\text{Fe-LDH/NF-t}$  prepared under different deposition durations: 5, 8, 10, 12, and 15 min. (a) CV curves; (b) Polarization curves; (c) Tafel slopes deriving from corresponding polarization curves; (d) EIS spectra; (e) Electrochemical active surface area (ECSA); (f) Comparison of the overpotentials at  $10 \text{ mA cm}^{-2}$  and Tafel slopes with previously reported transition metal LDH-based electrocatalysts.

The optimization of the catalytic performance of  $\text{Ni}_3\text{Fe-LDH}$  was pursued by varying the electrodeposition durations, as shown in Fig. S7 and Table S4. The reduction peak of the  $\text{Ni}^{3+}/\text{Ni}^{2+}$  redox pair exhibits an initial increase followed by a decrease with extended electrodeposition durations (Fig. S7a). Notably, among all the samples,  $\text{Ni}_3\text{Fe-LDH/NF-8}$  displays the broadest and most pronounced reduction peak, indicating a highly electron-rich local structure at the Ni sites. Evaluation of the polarization curves reveals that  $\text{Ni}_3\text{Fe-LDH/NF-8}$  exhibits the highest OER activity,

requiring an impressively low overpotential of only 189 mV to achieve a current density of 10 mA cm<sup>-2</sup> (Fig. S7b). This observation suggests that a moderate deposition time contributes to enhanced catalytic activity. Analysis of the Tafel plots (Fig. S7c) further demonstrates that Ni<sub>3</sub>Fe-LDH/NF-8 exhibits the smallest Tafel slope (34.2 mV dec<sup>-1</sup>) among all the samples (Ni<sub>3</sub>Fe-LDH/NF-5, 77.6 mV dec<sup>-1</sup>; Ni<sub>3</sub>Fe-LDH/NF-10, 44.1 mV dec<sup>-1</sup>; Ni<sub>3</sub>Fe-LDH/NF-12, 47.3 mV dec<sup>-1</sup>; Ni<sub>3</sub>Fe-LDH/NF-15, 49.2 mV dec<sup>-1</sup>), indicating its superior OER reaction kinetics. Additionally, Ni<sub>3</sub>Fe-LDH/NF-8 shows the lowest charge transfer resistance ( $R_{ct}$ ) of 1.90  $\Omega$  compared to the other samples (Ni<sub>3</sub>Fe-LDH/NF-5, 2.60  $\Omega$ ; Ni<sub>3</sub>Fe-LDH/NF-10, 2.10  $\Omega$ ; Ni<sub>3</sub>Fe-LDH/NF-12, 2.13  $\Omega$ ; Ni<sub>3</sub>Fe-LDH/NF-15, 2.24  $\Omega$ ) under an overpotential of 230 mV (Fig. S7d), thereby facilitating efficient electron transfer. The double-layer capacitance ( $C_{dl}$ ) was derived from the CV curves measured at various scan rates (Fig. S8). As depicted in Fig. S7e, reveals that Ni<sub>3</sub>Fe-LDH/NF-8 exhibits the largest  $C_{dl}$  value of 2.37 mF cm<sup>-2</sup>, surpassing the other Ni<sub>3</sub>Fe-LDH samples (Ni<sub>3</sub>Fe-LDH/NF-5, 1.98 mF cm<sup>-2</sup>; Ni<sub>3</sub>Fe-LDH/NF-10, 2.36 mF cm<sup>-2</sup>; Ni<sub>3</sub>Fe-LDH/NF-12, 2.20 mF cm<sup>-2</sup>; Ni<sub>3</sub>Fe-LDH/NF-15, 2.01 mF cm<sup>-2</sup>). This finding suggests that Ni<sub>3</sub>Fe-LDH/NF-8 provides a greater number of active sites during the OER reaction process, further enhancing its catalytic performance. Notably, the as-prepared Ni<sub>3</sub>Fe-LDH/NF-8 surpasses most of reported OER catalysts and locates among the most efficient ones (Fig. S7f and Table S5).

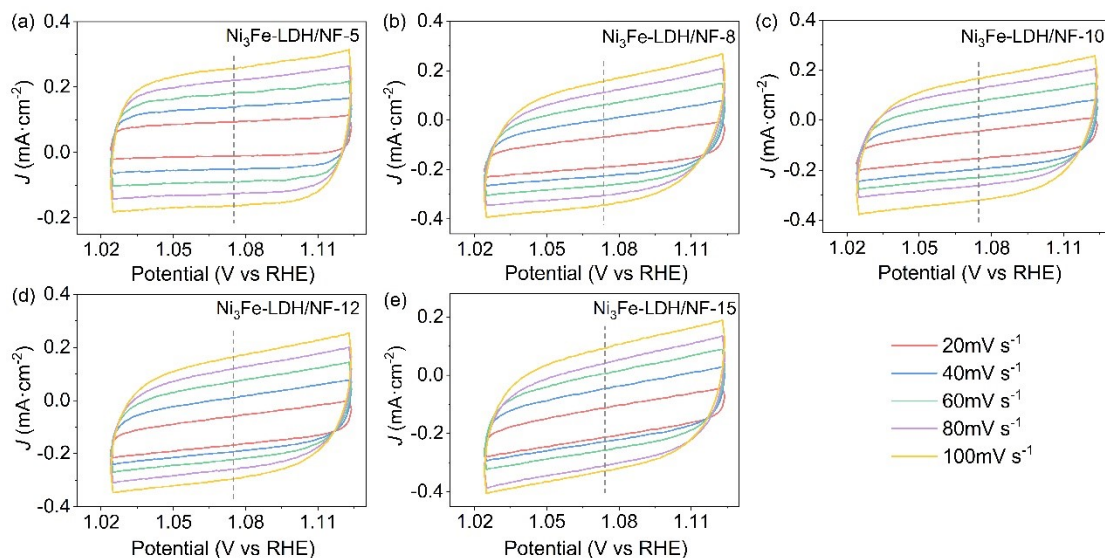

Fig. S8 CV curves measured with varying scan rates of 20, 40, 60, 80, and 100  $\text{mV s}^{-1}$ .

(a)  $\text{Ni}_3\text{Fe-LDH/NF-5}$ , (b)  $\text{Ni}_3\text{Fe-LDH/NF-8}$ , (c)  $\text{Ni}_3\text{Fe-LDH/NF-10}$ , (d)  $\text{Ni}_3\text{Fe-LDH/NF-12}$ , (e)  $\text{Ni}_3\text{Fe-LDH/NF-15}$ .

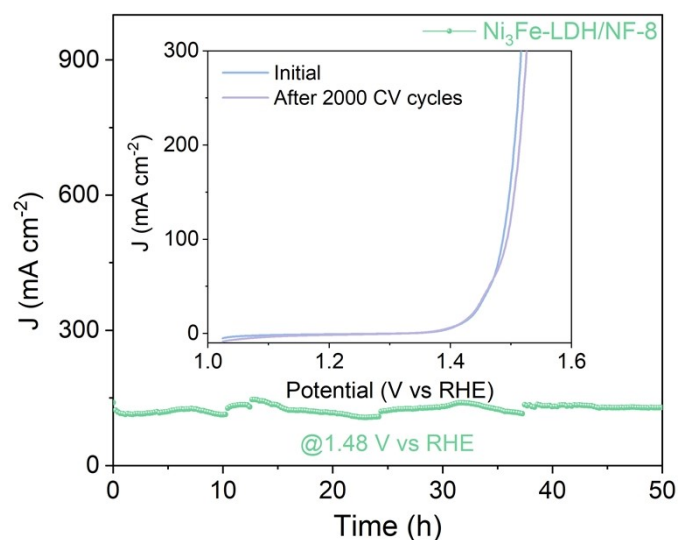

Fig. S9 Electrochemical stability evaluation of the  $\text{Ni}_3\text{Fe-LDH/NF-8}$ . 50-hour chronoamperometric test of  $\text{Ni}_3\text{Fe-LDH/NF-8}$  at 1.48 V vs RHE. The inset is polarization curves of  $\text{Ni}_3\text{Fe-LDH/NF-8}$  before and after 2000 cycles of CV test.

The stability of catalysts is a critical parameter in evaluating their practicality. To assess the OER stability of Ni<sub>3</sub>Fe-LDH/NF-8, cyclic voltammetry (CV) scans were performed between 1.0 and 2.0 V vs. RHE at a scan rate of 100 mV s<sup>-1</sup>, as shown in Fig. S9. Remarkably, even after undergoing 2000 consecutive cycles of measurement, no significant decay in activity is observed. The durability of Ni<sub>3</sub>Fe-LDH/NF-8 is further confirmed by the stable current output during the chronoamperometry measurements over a 50-hour period. These findings highlight the excellent stability of Ni<sub>3</sub>Fe-LDH/NF-8 as an OER catalyst, making it a promising candidate for practical applications.

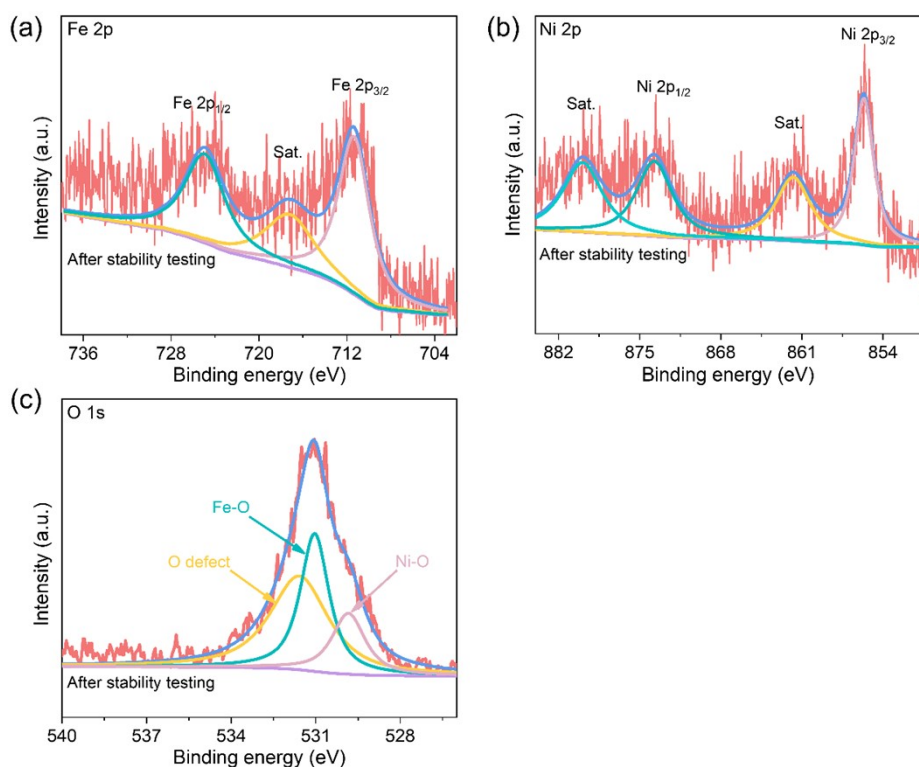

Fig. S10 XPS characterization of the post-reaction Ni<sub>3</sub>Fe-LDH/NF-8. (a) Fe 2p spectra, (b) Ni 2p spectra, (c) O 1s spectra.

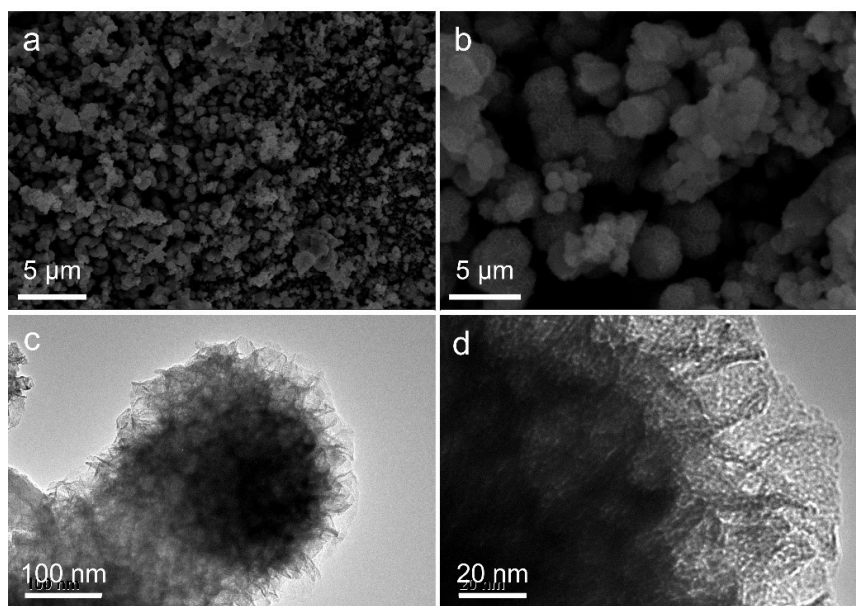

Fig. S11 SEM and TEM images of the post-reaction  $\text{Ni}_3\text{Fe-LDH/NF-8}$ . (a) and (b): SEM images, (c) and (d): TEM images.

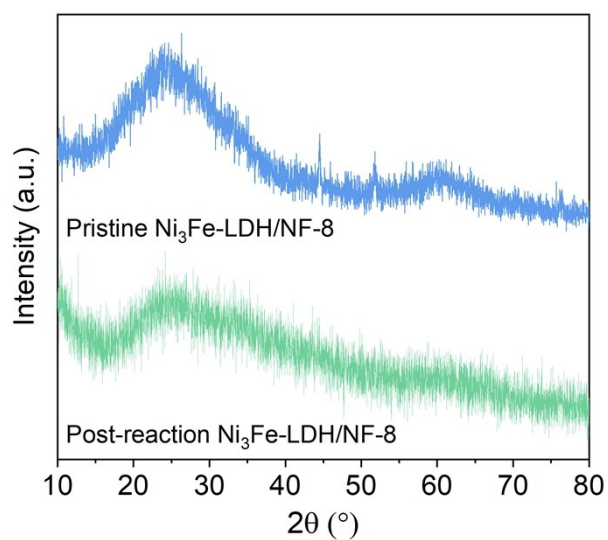

Fig. S12 XRD patterns of pristine and post-reaction  $\text{Ni}_3\text{Fe-LDH NF-8}$ .

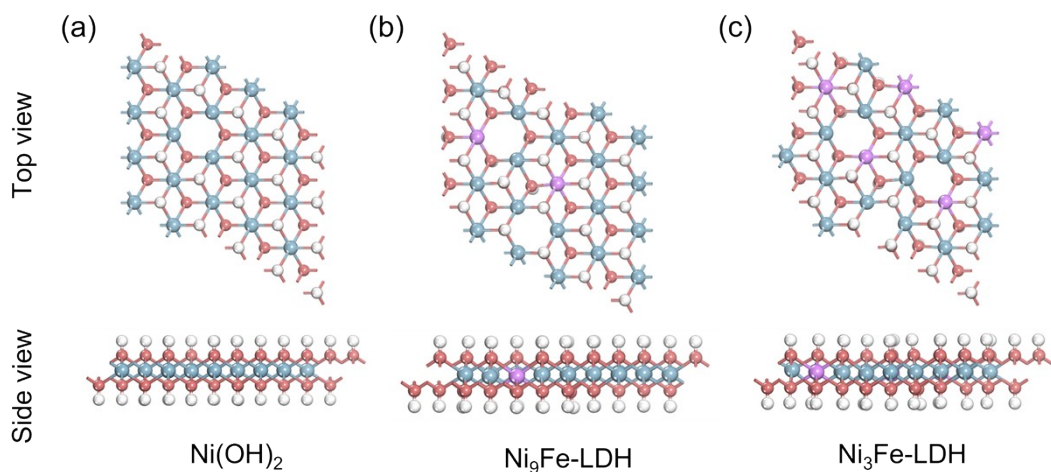

Fig. S13 Model structure constructed for DFT calculations. Top view and side view of the structures are separately shown on top and bottom. (a)  $\text{Ni}(\text{OH})_2$ , (b)  $\text{Ni}_9\text{Fe-LDH}$ , (c)  $\text{Ni}_3\text{Fe-LDH}$ . In the model,  $\text{Ni}(\text{OH})_2$  removes 1 oxygen atom,  $\text{Ni}_9\text{Fe-LDH}$  removes 2 oxygen atoms, and  $\text{Ni}_3\text{Fe-LDH}$  removes 3 oxygen atoms, to simulate different oxygen vacancy concentrations. The blue, purple, pink, and white balls represent Ni, Fe, O, and H atoms, respectively.

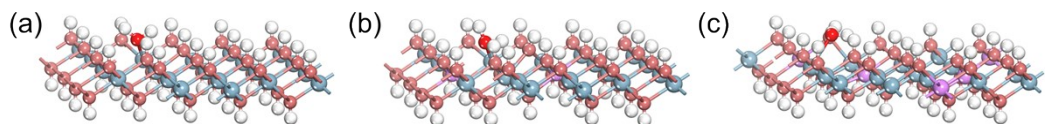

Fig. S14 Adsorption model of  $\text{H}_2\text{O}$  molecules. (a)  $\text{Ni}(\text{OH})_2$ , (b)  $\text{Ni}_9\text{Fe-LDH}$ , and (c)  $\text{Ni}_3\text{Fe-LDH}$ .

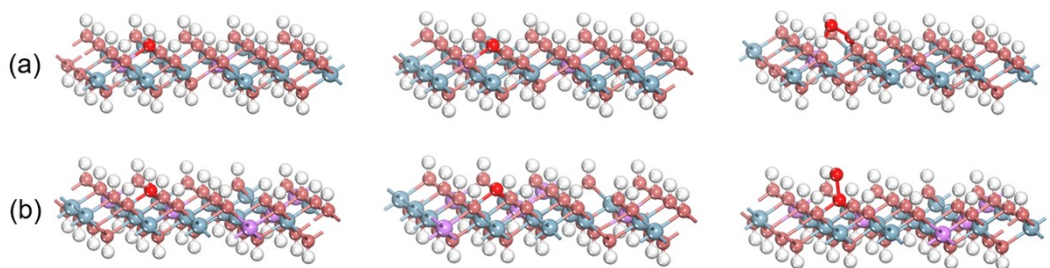

Fig. S15 Reaction coordinates adsorbed on (a) Ni<sub>9</sub>Fe-LDH and (b) Ni<sub>3</sub>Fe-LDH during OER reaction. Adsorptions of \*OH, \*O and \*OOH on Ni active site are shown from left to right.

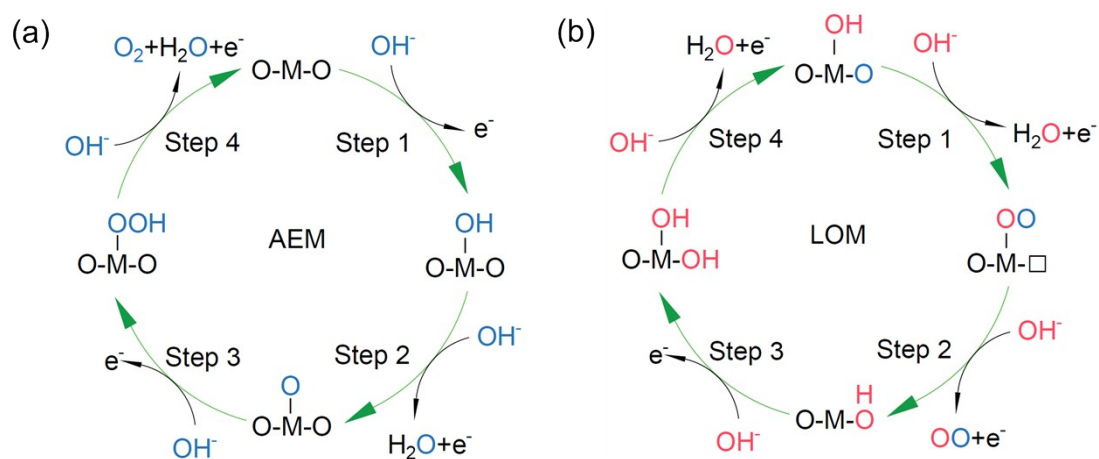

Fig. S16 Different reaction pathways for OER. (a) Adsorbate evolution mechanism (AEM). (b) Lattice oxygen oxidation mechanism (LOM).

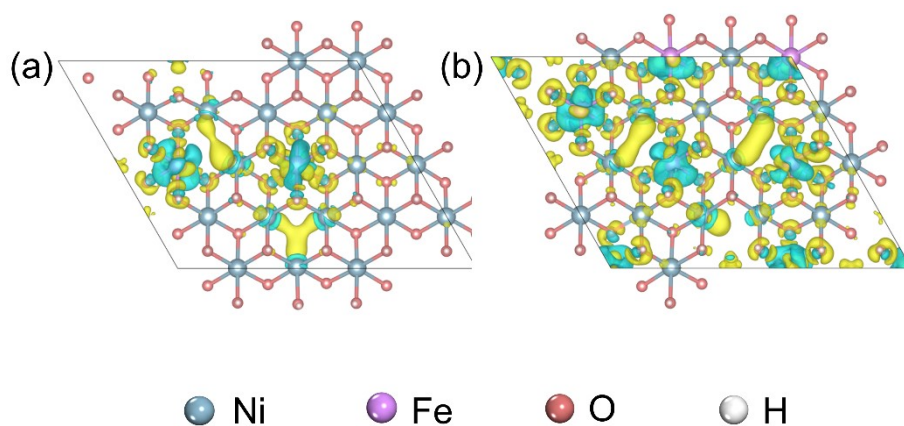

Fig. S17 Top view of the charge density differences. (a) Ni<sub>9</sub>Fe-LDH, (b) Ni<sub>3</sub>Fe-LDH.

### 3 Supplementary Tables

Table S1 Elemental composition of Ni<sub>9</sub>Fe-LDH and Ni<sub>3</sub>Fe-LDH detected by ICP-OES.

| Samples                | Elements | Content/g L <sup>-1</sup> |
|------------------------|----------|---------------------------|
| Ni <sub>9</sub> Fe-LDH | Ni       | 454.7                     |
|                        | Fe       | 51.1                      |
| Ni <sub>3</sub> Fe-LDH | Ni       | 301.5                     |
|                        | Fe       | 102.7                     |

Table S2 XPS (Ni 2p, Fe 2p and O 1s regions) binding energy and assignment.

| Sample                 | Binding energy/eV | Assignments           |
|------------------------|-------------------|-----------------------|
| Ni(OH) <sub>2</sub>    | 855.6             | Ni 2p <sub>3/2</sub>  |
|                        | 873.3             | Ni 2p <sub>1/2</sub>  |
|                        | 861.2             | Satellite             |
|                        | 879.1             | Satellite             |
|                        | 531.1             | Ni-O, O 1s            |
|                        | 532.4             | O <sub>v</sub> , O 1s |
| Ni <sub>9</sub> Fe-LDH | 855.2             | Ni 2p <sub>3/2</sub>  |
|                        | 873.0             | Ni 2p <sub>1/2</sub>  |
|                        | 861.4             | Satellite             |
|                        | 879.1             | Satellite             |
|                        | 711.3             | Fe 2p <sub>3/2</sub>  |
|                        | 724.7             | Fe 2p <sub>1/2</sub>  |
|                        | 717.0             | Satellite             |
|                        | 529.7             | Ni-O, O 1s            |
|                        | 530.7             | Fe-O, O 1s            |
|                        | 531.45            | O <sub>v</sub> , O 1s |
| Ni <sub>3</sub> Fe-LDH | 854.95            | Ni 2p <sub>3/2</sub>  |
|                        | 872.4             | Ni 2p <sub>1/2</sub>  |
|                        | 860.7             | Satellite             |
|                        | 872.5             | Satellite             |
|                        | 711.35            | Fe 2p <sub>3/2</sub>  |
|                        | 724.6             | Fe 2p <sub>1/2</sub>  |
|                        | 716.9             | Satellite             |
|                        | 529.6             | Ni-O, O 1s            |
|                        | 530.55            | Fe-O, O 1s            |
|                        | 531.4             | O <sub>v</sub> , O 1s |
| Fe(OH) <sub>3</sub>    | 711.25            | Fe 2p <sub>3/2</sub>  |
|                        | 724.5             | Fe 2p <sub>1/2</sub>  |
|                        | 716.1             | Satellite             |
|                        | 530.3             | Fe-O, O 1s            |
|                        | 531.3             | O <sub>v</sub> , O 1s |

Table S3 Chemical bond length from the EXAFS spectra.

| Sample                 | Type of band | R (Å) |
|------------------------|--------------|-------|
| Ni foil                | Ni-Ni        | 2.17  |
| NiO                    | Ni-O         | 1.65  |
|                        | Ni-Ni        | 2.55  |
| Ni <sub>9</sub> Fe-LDH | Ni-O         | 1.20  |
|                        | Ni-Ni/Fe     | 2.15  |
| Ni <sub>3</sub> Fe-LDH | Ni-O         | 1.59  |
|                        | Ni-Ni/Fe     | 2.19  |

Table S4 Electrochemical results summarization of Ni<sub>3</sub>Fe-LDH/NF-t during OER

processes

| Sample                       | Overpotential<br>@10 mA cm <sup>-2</sup> | Tafel slope<br>mV dec <sup>-1</sup> | R <sub>s</sub> /Ω | R <sub>ct</sub> /Ω |
|------------------------------|------------------------------------------|-------------------------------------|-------------------|--------------------|
| Ni <sub>3</sub> Fe-LDH/NF-5  | 199                                      | 77.6                                | 1.45              | 2.60               |
| Ni <sub>3</sub> Fe-LDH/NF-8  | 189                                      | 34.2                                | 1.59              | 1.90               |
| Ni <sub>3</sub> Fe-LDH/NF-10 | 195                                      | 44.1                                | 1.60              | 2.10               |
| Ni <sub>3</sub> Fe-LDH/NF-12 | 197                                      | 47.3                                | 1.56              | 2.13               |
| Ni <sub>3</sub> Fe-LDH/NF-15 | 199                                      | 49.2                                | 1.52              | 2.24               |

Table S5 Comparison of Overpotential at 10 mA·cm<sup>-2</sup> and Tafel slope of Ni<sub>3</sub>Fe-LDH/NF-8 and currently reported LDH-based electrocatalysts.

| Catalyst                            | Substrate | Overpotential<br>@10 mA cm <sup>-2</sup> | Tafel slope<br>mV dec <sup>-1</sup> | Ref       |
|-------------------------------------|-----------|------------------------------------------|-------------------------------------|-----------|
| Ni <sub>3</sub> Fe-LDH/NF-8         | NF        | 189                                      | 67.2                                | This work |
| NiFe-LDH                            | GCE       | 261                                      | 32.5                                | 5         |
| NiFe-LDH array                      | NF        | 224                                      | 52.8                                | 6         |
| GDY@NiFe-LDH                        | Cu foil   | 260                                      | 95                                  | 7         |
| NiFe/N-TiO <sub>2</sub>             | GCE       | 235                                      | 48.9                                | 8         |
| A-NiFe-LDH                          | GCE       | 241                                      | 55                                  | 9         |
| Exf. NiFe-LDH/CB                    | GCE       | 220                                      | 35                                  | 10        |
| Fe <sup>2+</sup> -NiFe-LDH-EO6 h@NF | NF        | 239                                      | 48.3                                | 11        |
| NiFe-LDHs/NF                        | NF        | 245                                      | 27                                  | 12        |
| NiFeLDH/Co-NC                       | GCE       | 282                                      | 64                                  | 13        |
| CeO <sub>2</sub> /NiFe-LDH          | GCE       | 246                                      | 65                                  | 14        |
| CNS@NiFe-LDH                        | CCF       | 248                                      | 32.9                                | 15        |
| IrOx/U-NiFe-LDH                     | NF        | 236                                      | 74.3                                | 16        |
| NiO/C@NiFe-LDHs                     | NF        | 299                                      | 45                                  | 17        |
| NiFe-LDH-0.4M HMS                   | NF        | 290                                      | 51                                  | 18        |
| CFA <sub>0.8</sub> -LDH/NF-200CV    | NF        | 222                                      | 25.4                                | 19        |
| PLDH/GO                             | NF        | 236                                      | 52                                  | 20        |
| NiFe-LDH Sn <sub>0.015</sub> (M)    | NF        | 250                                      | 66                                  | 21        |
| NiFe-LDH/CNT@GNR                    | NF        | 261                                      | 78                                  | 22        |
| NiFe-LDH@OMC/CC                     | CC        | 223                                      | 56.6                                | 23        |
| CeO <sub>2</sub> -x/NiFe-LDH        | NF        | 216                                      | 74.1                                | 24        |

## Reference

1. G. Kresse and J. Furthmüller, *Phys. Rev. B*, 1996, **54**, 11169-11186.
2. G. Kresse and J. Furthmüller, *Comput. Mater. Sci.*, 1996, **6**, 15-50.
3. J. P. Perdew, K. Burke and M. Ernzerhof, *Phys. Rev. Lett.*, 1996, **77**, 3865-3868.
4. P. Zhai, M. Xia, Y. Wu, G. Zhang, J. Gao, B. Zhang, S. Cao, Y. Zhang, Z. Li, Z. Fan, C. Wang, X. Zhang, J. T. Miller, L. Sun and J. Hou, *Nat. Commun.*, 2021, **12**, 4587.
5. Y. Zheng, H. Deng, H. Feng, G. Luo, R. Tu and L. Zhang, *J. Colloid Interface Sci.*, 2023, **629**, 610-619.
6. Z. Li, M. Shao, H. An, Z. Wang, S. Xu, M. Wei, D. G. Evans and X. Duan, *Chem. Sci.*, 2015, **6**, 6624-6631.
7. G. Shi, C. Yu, Z. Fan, J. Li and M. Yuan, *ACS Appl. Mater. Interfaces*, 2019, **11**, 2662-2669.
8. X. Liu, Z. Chen and M. Cao, *ACS Appl. Energy Mater.*, 2019, **2**, 5960-5967.
9. J. Liu, J. Zhou, S. Liu, G. Chen, W. Wu, Y. li, P. Jin and C. Xu, *Electrochim. Acta*, 2020, **356**, 136827.
10. T. S. Munonde, H. Zheng and P. N. Nomngongo, *Ultrason. Sonochem.*, 2019, **59**, 104716.
11. Y. Wang, X. Zhang, L. Huang, Y. Guo, X. Yuan, H. Hou, J. Wu, C. Lu and Y. Zhang, *J. Colloid Interface Sci.*, 2021, **599**, 168-177.
12. R. A. Senthil, J. Pan, X. Yang and Y. Sun, *Int. J. Hydrogen Energy*, 2018, **43**, 21824-21834.

13. S. Zhu, J. Wang, H. Li, J. Cai, Y. Li, J. Hu, Y. He and Y. Zhou, *ACS Appl. Nano Mater.*, 2022, **5**, 13047-13054.
14. Q. Dong, C. Shuai, Z. Mo, N. Liu, G. Liu, J. Wang, H. Pei, Q. Jia, W. Liu and X. Guo, *J. Solid State Chem.*, 2021, **296**, 121967.
15. Y. Kong, J. Li, Y. Wang, W. Chu and Z. Liu, *Catal. Lett.*, 2020, **150**, 3049-3057.
16. D. Liu, Y. Du, T. Li, H. Zhang, D. Liu, W. Zhang, H. Tang, Y. Hou, J. Li, S. Yan, T. Yu and Z. Zou, *Chem. Commun.*, 2020, **56**, 11465-11468.
17. X. Li, M. Fan, D. Wei, X. Wang and Y. Wang, *J. Electrochem. Soc.*, 2020, **167**, 024501.
18. H. Zhong, T. Liu, S. Zhang, D. Li, P. Tang, N. Alonso-Vante and Y. Feng, *J. Energy Chem.*, 2019, **33**, 130-137.
19. J. Zhong, Q. Chen, C. Guo, W. Peng, Y. Li, F. Zhang and X. Fan, *Int. J. Hydrogen Energy*, 2023, **48**, 23530-23539.
20. J. Xie, C. Li, J. Niu, S. Zhang, X. Ou, P. Feng and H. Garcia, *Mater. Lett.*, 2021, **290**, 129517.
21. K. Bera, R. Madhu, H. N. Dhandapani, S. Nagappan, A. De and S. Kundu, *Inorg. Chem.*, 2022, **61**, 16895-16904.
22. X. Yin, Y. Hua, W. Hao, J. Yang and Z. Gao, *Electrochim. Acta*, 2022, **420**, 140455.
23. G. Huang, C. Zhang, Z. Liu, S. Yuan, G. Yang and N. Li, *Appl. Surface Sci.*, 2021, **565**, 150533.
24. Y. Du, D. Liu, T. Li, Y. Yan, Y. Liang, S. Yan and Z. Zou, *Appl. Catal. B-*

*Environ.*, 2022, **306**, 121146.
